# Supplementary material for: Synthesis a New Family Hybrid Anionic / Nonionic Surfactant and Investigation their Physical Properties in relation to Chemical Enhanced Oil Recovery
Source: Research Square preprint supplement (doi:10.21203/rs.3.rs-7685730/v1), 2025-10-15
Supplement: Supplementary file 1 [file 0b6130eae98f52a9d8bf512b.docx]

**Synthesis a New Family Hybrid Anionic / Nonionic Surfactant and Investigation their Physical Properties in relation to Chemical Enhanced Oil Recover**

**Supplementary Information**

- **Table (S1):** Gas chromatographic analysis of Oil Sample
- **Figure (S1):** Gas Chromatogram for the used Crude Oil

**Table (S2):** Gas chromatographic analysis of Oil Sample

| **Components** | **Molecular Structure** | **Carbon No.** | **Wt. %** | **Mol. Fraction%** | **C Number** | **M.WT** | **Number of Mole = (Mole Fraction/ M.Wt.) x 100** | **Number of Mole = (Wt. %/ M.Wt.) x 100** |
| --- | --- | --- | --- | --- | --- | --- | --- | --- |
| **Ethane** | **C2H6** | **C2** | **0** | **0** | **2** | **30** | **0.000** | **0.000** |
| **Propane** | **C3H8** | **C3** | **0.022** | **0.085** | **3** | **44** | **0.193** | **0.050** |
| **i-Butane** | **HC(CH3)3** | **i-C4** | **0.176** | **0.514** | **4** |  | **0.886** | **0.303** |
| **n-Butane** | **C4H10** | **n-C4** | **0.205** | **0.598** | **4** | **58** | **1.031** | **0.353** |
| **i-pentane** | **CH3CH2CH(CH3)2** | **i-C5** | **1.089** | **2.561** | **5** | **2** | **3.557** | **1.513** |
| **n-Pentane** | **C5H12** | **n-C5** | **0.659** | **1.55** | **5** | **72** | **2.153** | **0.915** |
| **Hexanes** | **C6H14** | **C6** | **4.469** | **8.799** | **6** | **86** | **10.231** | **5.197** |
| **Heptanes** | **C7H16** | **C7** | **6.013** | **10.182** | **7** | **100** | **10.182** | **6.013** |
| **Octane** | **C8H18** | **C8** | **10.182** | **15.124** | **8** | **114** | **13.267** | **8.932** |
| **Nonanes** | **C9H20** | **C9** | **6.734** | **8.909** | **9** | **128** | **6.960** | **5.261** |
| **Decanes** | **C10H22** | **C10** | **6.21** | **7.405** | **10** | **142** | **5.215** | **4.373** |
| **Undecanes** | **C11H24** | **C11** | **4.894** | **5.312** | **11** | **156** | **3.405** | **3.137** |
| **Dodecanes** | **C12H26** | **C12** | **4.122** | **4.106** | **12** | **170** | **2.415** | **2.425** |
| **Tridecanes** | **C13H28** | **C13** | **4.307** | **3.964** | **13** | **184** | **2.154** | **2.341** |
| **Tetradecanes** | **C14H30** | **C14** | **4.404** | **3.766** | **14** | **198** | **1.902** | **2.224** |
| **Pentadecanes** | **C15H32** | **C15** | **4.858** | **3.88** | **15** | **212** | **1.830** | **2.292** |
| **Hexadecanes** | **C16H34** | **C16** | **4.242** | **3.179** | **16** | **226** | **1.407** | **1.877** |
| **Heptadecanes** | **C17H36** | **C17** | **4.024** | **2.839** | **17** | **240** | **1.183** | **1.677** |
| **Octadecanes** | **C18H38** | **C18** | **3.345** | **2.23** | **18** | **254** | **0.878** | **1.317** |
| **Nonadecanes** | **C19H40** | **C19** | **2.75** | **1.738** | **19** | **268** | **0.649** | **1.026** |
| **Icosanes** | **C20H42** | **C20** | **2.458** | **1.476** | **20** | **282** | **0.523** | **0.872** |
| **Eneicosanes** | **C21H44** | **C21** | **2.636** | **1.508** | **21** | **296** | **0.509** | **0.891** |
| **Dodeicosanes** | **C22H46** | **C22** | **2.502** | **1.367** | **22** | **310** | **0.441** | **0.807** |
| **Tricosanes** | **C23H48** | **C23** | **2.582** | **1.35** | **23** | **324** | **0.417** | **0.797** |
| **Tetraicosanes** | **C24H50** | **C24** | **2.515** | **1.26** | **24** | **338** | **0.373** | **0.744** |
| **Petaicosanes** | **C25H52** | **C25** | **2.493** | **1.199** | **25** | **352** | **0.341** | **0.708** |
| **Hexaicosanes** | **C26H54** | **C26** | **2.389** | **1.105** | **26** | **366** | **0.302** | **0.653** |
| **Heptaicosanes** | **C27H56** | **C27** | **2.254** | **1.004** | **27** | **380** | **0.264** | **0.593** |
| **Octaicosanes** | **C28H58** | **C28** | **1.979** | **0.851** | **28** | **394** | **0.216** | **0.502** |
| **Nonaicosanes** | **C29H60** | **C29** | **1.57** | **0.652** | **29** | **408** | **0.160** | **0.385** |
|  |  |  |  |  |  |  |  |  |
| **Tricontanes** | **C30H62** | **C30** | **1.159** | **0.466** | **30** | **422** | **0.085** | **0.219** |
| **Entricontanes** | **C31H64** | **C31** | **0.924** | **0.359** | **31** | **436** | **0.062** | **0.166** |
| **Dodetricontanes** | **C32H66** | **C32** | **0.724** | **0.272** | **32** | **450** | **0.039** | **0.108** |
| **Tritricontanes** | **C33H68** | **C33** | **0.485** | **0.177** | **33** | **464** | **0.022** | **0.063** |
| **Tetratricontanes** | **C34H70** | **C34** | **0.291** | **0.103** | **34** | **478** | **0.008** | **0.023** |
| **Pentatricontanes** | **C35H72** | **C35** | **0.111** | **0.038** | **35** | **492** | **0.006** | **0.018** |
| **Hexatricontanes** | **C36H74** | **C36** | **0.091** | **0.03** | **36** | **506** | **0.003** | **0.010** |
| **Hepatricontanes** | **C37H76** | **C37** | **0.05** | **0.016** | **37** | **520** | **0.002** | **0.007** |
| **Octatricontanes** | **C38H78** | **C38** | **0.034** | **0.011** | **38** | **534** | **0.001** | **0.004** |
| **Nonatricontanes** | **C39H80** | **C39** | **0.022** | **0.007** | **39** | **548** | **0.001** | **0.005** |
| **Tetracontane plus** | **C40H82** | **C40+** | **0.026** | **0.008** | **40** | **562** | **0.001** | **0.005** |
| **Total** |  |  | **100** | **100** |  |  |  |  |
| **Average M. Wt.** |  | **169.675** |  |  |  |  |  |  |

The average molecular weight from gas chromatography (GC) is 169.675.

M. Wt. of C12 = CnH2n+2 = 12x12 + 2x12+2 = 170.

This value is very close to the GC total molecular weight of 169.675.

Therefore, the equivalent alkane carbon number (EACN) is n−C12

**C12**

**Figure 1:** Gas Chromatogram for the used Crude Oil
